# Supplementary material for: Calibration of PurpleAir low-cost particulate matter sensors: model development for air quality under high relative humidity conditions
Source: Copernicus journal article supplement (doi:10.5194/amt-17-6735-2024), 2024-11-26
Supplement: Supplementary file [file amt-17-6735-2024-supplement.pdf]

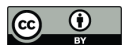

*Supplement of*

## **Calibration of PurpleAir low-cost particulate matter sensors: model development for air quality under high relative humidity conditions**

**Martine E. Mathieu-Campbell et al.**

*Correspondence to:* Jennifer Richmond-Bryant ([jrbryan3@ncsu.edu](mailto:jrbryan3@ncsu.edu))

The copyright of individual parts of the supplement might differ from the article licence.

1 **SUPPLEMENTAL MATERIAL**

2  
3 **List of tables and figures**

4  
5 Table S1: Percentage of hourly data removed by QA process from the initial 56 PurpleAir sensors

6 Table S2: MLR model development (model fit using hourly data) for the 1.0-km radius

7 Table S3: SSC model development for the 1.0-km radius

8 Table S4: MLR model development (model fit using hourly data) for the 2.0-km radius

9 Table S5: SSC model development for the 2.0-km radius

10 Table S6: LGOCV results – MLR models

11 Table S7: LGOCV results – SSC models

12 Table S8: LOSOCV results using Model 4 from MLR and SSC

13 Table S9: Methods evaluated to determine the optimal number of clusters using NbClust

14 Table S10: MLR and SSC model development (model fit using hourly data) for the 0.5-km radius

15 Table S11: Evaluation of the performance of the models by AQI category

16 Table S12: Summary table of the evaluation of the AQI per model for the daily dataset

17 Table S13: List of the PurpleAir sensors and AQS used in the study with the estimated distance between  
18 stations

19 Table S14: Tests of model coefficient precision

20  
21 Figure S1: Correlation graphs between RH from each PA sensor and RH from the nearest NOAA sensor  
22 (Table S13).

23 Figure S2: Correlation graphs between RH from PA sensors and RH from the nearest NOAA sensor to  
24 each PA sensor. a) All the 21 PA sensors for the 0.5-km radius, b) All PA sensors except r), s) and t) from  
25 Figure S1.

26 Figure S3: Distribution of RH and T from PurpleAir data for our three buffers (0.5 km, 1.0 km and 2.0  
27 km)

28 Figure S4: Distribution of RH and T from PurpleAir data for our three buffers (0.5 km, 1.0 km and 2.0  
29 km).

30 Figure S5: Correlation between DP from PurpleAir and NOAA

31  
32  
33  
34  
35  
36

37 **1 Data cleaning process**

38 Table S1: Percentage of hourly data removed by QA process from the initial 56 PurpleAir sensors

| QA criteria                                                                                                | % removed* |
|------------------------------------------------------------------------------------------------------------|------------|
| Process 1: Removing NAs (PM, T, RH)                                                                        | 2.026      |
| Process 2: Channels A & B agreement                                                                        |            |
| Low concentration ( $\leq 25 \mu\text{g m}^{-3}$ ): 537,246 obs.                                           | 2.242      |
| High concentration ( $>25 \mu\text{g m}^{-3}$ ): 80,196 obs.                                               | 2.056      |
| Process 3: A & B concentration $< 1.5 \mu\text{g m}^{-3}$                                                  | 6.753      |
| Process 4: Average A & B concentration $> 1000 \mu\text{g m}^{-3}$                                         | 0.005      |
| Process 5: Removing data from sensors with RH issues                                                       | 5.527      |
| Process 6: Removing $\text{RH} \neq 0\text{-}100\%$ and $\text{T} \neq 0\text{-}130\text{ }^\circ\text{F}$ | 3.484      |

39 \* percent removed from the total number of observations

40

41

42

43 The data cleaning process 5 allowed to remove faulty PA sensors (Figures S1 and S2). The 21 graphs  
 44 correspond to the 21 PA sensors for the 0.5-km radius. R, n and m correspond to the estimated Pearson  
 45 correlation, the number of data points and the slope of the linear regression.

46

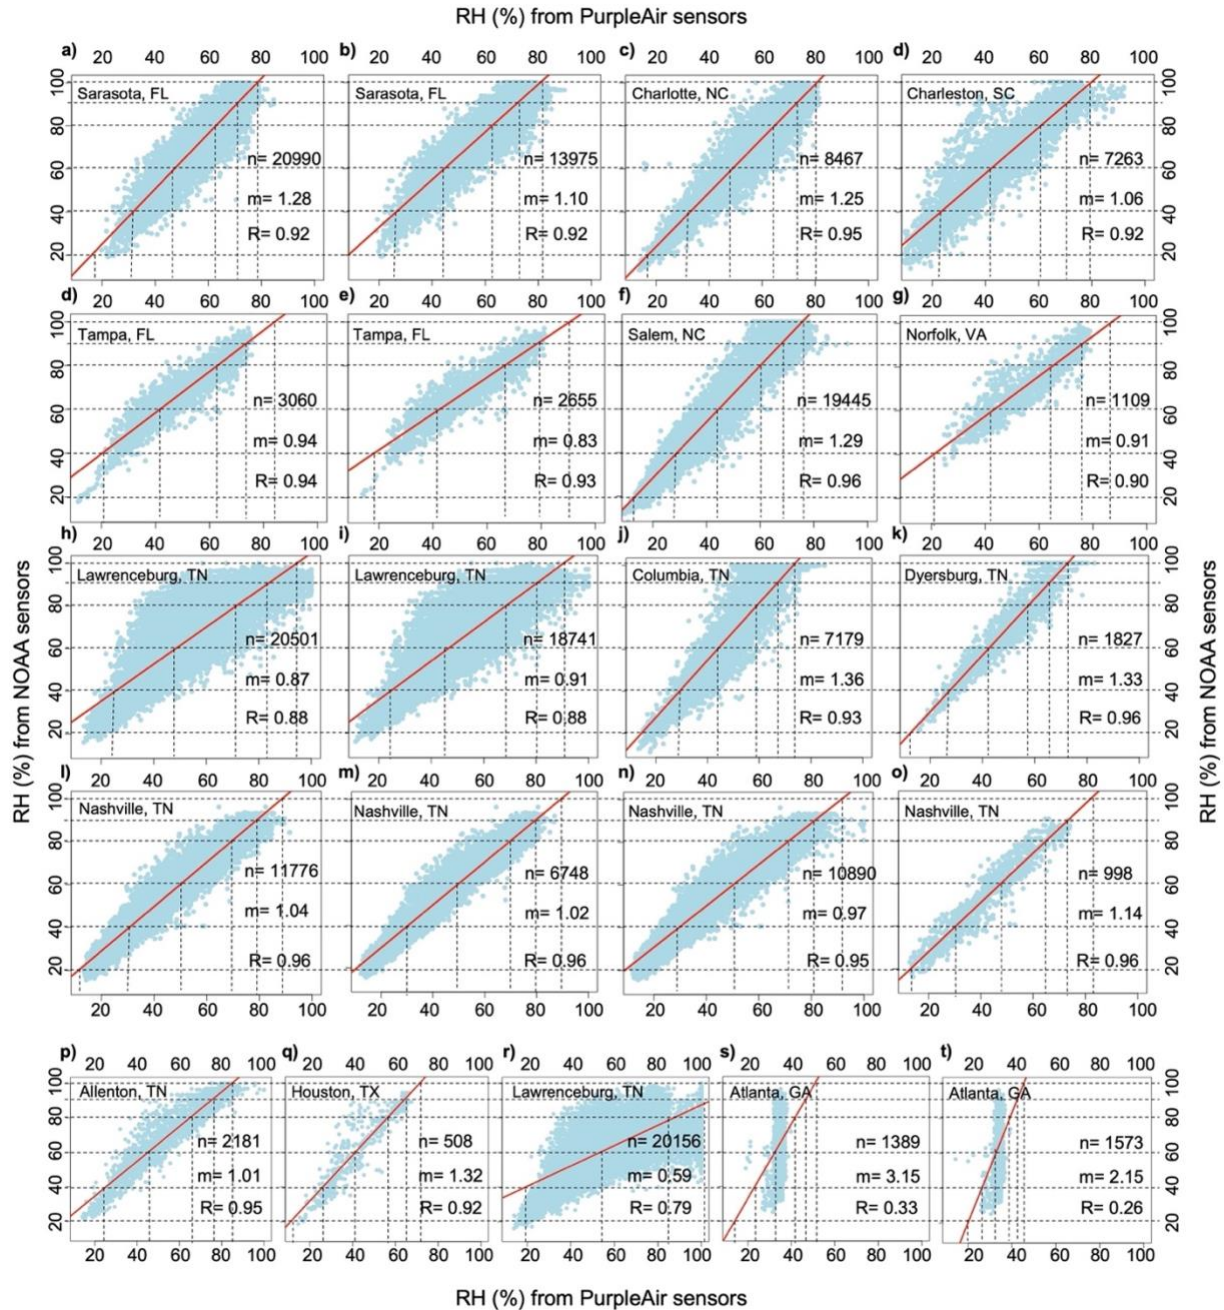

47

48 **Figure S1: Correlation graphs between RH from each PA sensor and RH from the nearest NOAA sensor (Table S13).**

49

50 Except for Figures S1-s and S1-t that present a very low Pearson correlation R, every individual PA  
 51 displays a correlation R varying between 79 % and 96 % with 16/21 PA sensors presenting an R equal or  
 52 greater than 90 %. As reported by recent studies (Tryner et al., 2020, Magi et al., 2020, Giordano et al.,  
 53 2021; Barkjohn et al., 2022), PA sensors tend to report dryer humidity measurements than ambient  
 54 conditions with a general difference of 10 % to 20 % for our sensors (Figure S2). However, Figure S1-r  
 55 shows that one of our PA sensors reported more humid measurements for RH values of 80 % or greater.  
 56

57 Moreover, the slope of the linear regression estimated for each PA sensor (Figure S1) shows that RH from  
 58 Figures S1-r, S1-s and S1-t exhibit the larger bias metrics. Figure S1-r shows that RH from the PA sensor  
 59 tend to underestimate ambient RH while PA sensors represented in Figures S1-s and S1-t tend to more  
 60 than doubled or tripled RH values from NOAA.

61  
 62

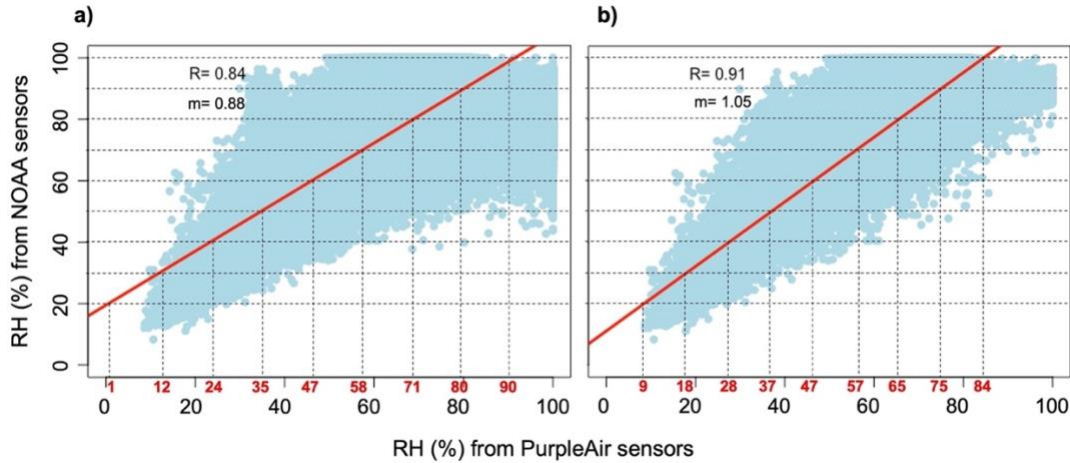

63  
 64 **Figure S2: Correlation graphs between RH from PA sensors and RH from the nearest NOAA sensor to each PA sensor. a)**  
 65 **All the 21 PA sensors for the 0.5-km radius, b) All PA sensors except r, s) and t) from Figure S1.**

66  
 67 **2 Evaluating our PurpleAir meteorological data**  
 68

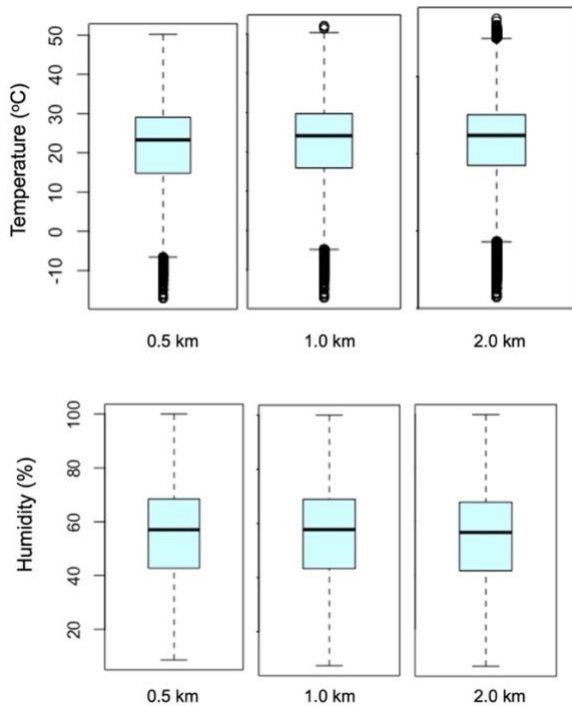

69  
 70 **Figure S3: Distribution of RH and T from PurpleAir data for our three buffers (0.5 km, 1.0 km and 2.0 km)**  
 71

72 Figure S4 shows that non-linearity in the curve started around RH of 50 %. PurpleAir datapoints that fell  
 73 within a range of RH less or equal to 50 % are in green and those that fell within a range greater than 50  
 74 % are shown in blue.

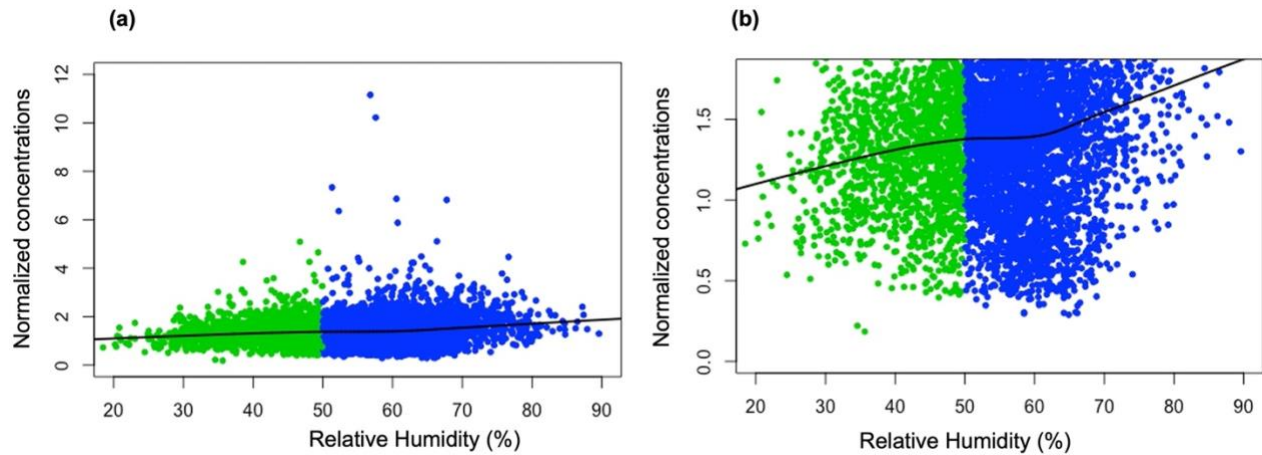

75  
 76 **Figure S4: Correlation between the ratio of raw PM<sub>2.5</sub> PurpleAir and AQS concentrations and RH showing the**  
 77 **nonlinearity of PM<sub>2.5</sub> PurpleAir concentrations. Graph a) represents the entire dataset, and graph b) is a zoom in to better**  
 78 **display the regression line and the nonlinearity of the data.**

79  
 80 **3 Model fit using the 1.0-km radius dataset**

81  
 82 Table S2: MLR model development (model fit using hourly data) for the 1.0-km radius

| Parameters      |                                                                                              | Model fit with hourly data |                               |                              |          |
|-----------------|----------------------------------------------------------------------------------------------|----------------------------|-------------------------------|------------------------------|----------|
| Models          |                                                                                              | R <sup>2</sup><br>(%)      | RMSE<br>(µg m <sup>-3</sup> ) | MAE<br>(µg m <sup>-3</sup> ) | R<br>(%) |
| <b>Model 1</b>  | 4.3410721+0.3796856 PA <sub>i</sub>                                                          | 58                         | 3.85                          | 2.47                         | 76       |
| <b>Model 2</b>  | 6.9941051+0.3872666 PA <sub>i</sub> -0.0489237 RH <sub>i</sub>                               | 60                         | 3.76                          | 2.40                         | 77       |
| <b>Model 3</b>  | 1.6915454+0.3849136 PA <sub>i</sub> +0.1149728 T <sub>i</sub>                                | 62                         | 3.68                          | 2.39                         | 78       |
| <b>Model 4</b>  | 4.1204142+0.3907494 PA <sub>i</sub> -0.0405732 RH <sub>i</sub> +<br>0.1050501 T <sub>i</sub> | 63                         | 3.61                          | 2.32                         | 79       |
| <b>Model Bj</b> | 5.72+0.524 PA <sub>i</sub> -0.0852 RH <sub>i</sub>                                           | 60                         | 4.40                          | 2.94                         | 77       |

83  
 84  
 85  
 86 Table S3: SSC model development for the 1.0-km radius

| Parameters                              |                                                                                                 | Model fit with hourly data |                               |                              |          |
|-----------------------------------------|-------------------------------------------------------------------------------------------------|----------------------------|-------------------------------|------------------------------|----------|
| Clusters<br>(Number of<br>observations) | Models                                                                                          | R <sup>2</sup><br>(%)      | RMSE<br>(µg m <sup>-3</sup> ) | MAE<br>(µg m <sup>-3</sup> ) | R<br>(%) |
| RH ≤ 50<br>(85616)                      | 2.782329 + 0.368994 PA <sub>i</sub> -<br>0.010616 RH <sub>i</sub> + 0.122888 T <sub>i</sub>     | 57                         | 3.94                          | 2.43                         | 75       |
| RH >50<br>(152431)                      | 5.1538241 + 0.3980145 PA <sub>i</sub> -<br>0.0539108 RH <sub>i</sub> + 0.0943790 T <sub>i</sub> | 67                         | 3.40                          | 2.26                         | 82       |

87  
88  
89  
90  
91

#### 4 Model fit using the 2.0-km radius dataset

Table S4: MLR model development (model fit using hourly data) for the 2.0-km radius

| Parameters      |                                                                                                   | Model fit with hourly data |                               |                              |          |
|-----------------|---------------------------------------------------------------------------------------------------|----------------------------|-------------------------------|------------------------------|----------|
| Models          |                                                                                                   | R <sup>2</sup><br>(%)      | RMSE<br>(µg m <sup>-3</sup> ) | MAE<br>(µg m <sup>-3</sup> ) | R<br>(%) |
| <b>Model 1</b>  | 4. 7265899 +0. 3763097 PA <sub>i</sub>                                                            | 55                         | 4.30                          | 2.72                         | 74       |
| <b>Model 2</b>  | 7. 5916138 +0. 3844184 PA <sub>i</sub> -0. 0545752 RH <sub>i</sub>                                | 58                         | 4.19                          | 2.63                         | 76       |
| <b>Model 3</b>  | 1. 7548043 +0. 3803865 PA <sub>i</sub> +0. 1250425 T <sub>i</sub>                                 | 59                         | 4.13                          | 2.62                         | 77       |
| <b>Model 4</b>  | 4. 3418026 +0. 3862249 PA <sub>i</sub> -0. 0425548 RH <sub>i</sub> +<br>0. 1101893 T <sub>i</sub> | 60                         | 4.06                          | 2.55                         | 78       |
| <b>Model Bj</b> | 5.72+0.524 PA <sub>i</sub> -0.0852 RH <sub>i</sub>                                                | 58                         | 4.84                          | 3.10                         | 76       |

92  
93  
94

Table S5: SSC model development for the 2.0-km radius

| Parameters                              |        | Model fit with hourly data |                               |                              |          |
|-----------------------------------------|--------|----------------------------|-------------------------------|------------------------------|----------|
| Clusters<br>(Number of<br>observations) | Models | R <sup>2</sup><br>(%)      | RMSE<br>(µg m <sup>-3</sup> ) | MAE<br>(µg m <sup>-3</sup> ) | R<br>(%) |

|                     |                                                               |    |      |      |    |
|---------------------|---------------------------------------------------------------|----|------|------|----|
| RH ≤ 50<br>(154276) | $2.6452739 + 0.3676529 PA_i - 0.0057266 RH_i + 0.1303605 T_i$ | 54 | 4.45 | 2.74 | 74 |
| RH >50<br>(239734)  | $6.0381100 + 0.3926179 PA_i - 0.0646265 RH_i + 0.0961319 T_i$ | 65 | 3.77 | 2.42 | 80 |

95  
96  
97  
98  
99

### 5 Cross-validation using LGOCV and LOSOCV for the 0.5-km radius

Table S6: LGOCV results – MLR models

| Parameters     |                                                               | Model fit with hourly data |                               |                              |          |
|----------------|---------------------------------------------------------------|----------------------------|-------------------------------|------------------------------|----------|
| Models         |                                                               | R <sup>2</sup><br>(%)      | RMSE<br>(µg m <sup>-3</sup> ) | MAE<br>(µg m <sup>-3</sup> ) | R<br>(%) |
| <b>Model 1</b> | $3.6667550 + 0.4053418 PA_i$                                  | 69                         | 3.19                          | 2.13                         | 83       |
| <b>Model 2</b> | $6.3384228 + 0.4143437 PA_i - 0.0506037 RH_i$                 | 71                         | 3.06                          | 2.05                         | 84       |
| <b>Model 3</b> | $1.7642336 + 0.4109897 PA_i + 0.0847196 T_i$                  | 71                         | 3.05                          | 2.06                         | 84       |
| <b>Model 4</b> | $4.3295358 + 0.4182906 PA_i - 0.0445768 RH_i + 0.0752867 T_i$ | 73                         | 2.95                          | 1.98                         | 85       |

100  
101  
102

Table S7: LGOCV results – SSC models

| Parameters                              |                                                           | Model fit with hourly data |                               |                              |          |
|-----------------------------------------|-----------------------------------------------------------|----------------------------|-------------------------------|------------------------------|----------|
| Clusters<br>(Number of<br>observations) | Models                                                    | R <sup>2</sup><br>(%)      | RMSE<br>(µg m <sup>-3</sup> ) | MAE<br>(µg m <sup>-3</sup> ) | R<br>(%) |
| RH ≤ 50<br>(59405)                      | $2.738732 + 0.425834 PA_i - 0.008944 RH_i + 0.079210 T_i$ | 71                         | 2.93                          | 1.86                         | 84       |
| RH >50<br>(100243)                      | $7.230374 + 0.412683 PA_i - 0.085278 RH_i + 0.070655 T_i$ | 74                         | 2.92                          | 2.02                         | 86       |

103  
104  
105



106 Table S8: LOSOCV results using Model 4 from MLR and SSC

| Data test State | MLR model                     |                              | SSC model                     |                              |                               |                              |
|-----------------|-------------------------------|------------------------------|-------------------------------|------------------------------|-------------------------------|------------------------------|
|                 | Model 4                       |                              | Cluster 1                     |                              | Cluster 2                     |                              |
|                 | RMSE ( $\mu\text{g m}^{-3}$ ) | MAE ( $\mu\text{g m}^{-3}$ ) | RMSE ( $\mu\text{g m}^{-3}$ ) | MAE ( $\mu\text{g m}^{-3}$ ) | RMSE ( $\mu\text{g m}^{-3}$ ) | MAE ( $\mu\text{g m}^{-3}$ ) |
| FL              | 3.02                          | 2.03                         | 2.42                          | 1.48                         | 3.19                          | 2.21                         |
| NC              | 2.86                          | 1.89                         | 2.89                          | 1.78                         | 2.71                          | 1.85                         |
| TN              | 3.26                          | 2.37                         | 3.12                          | 2.1                          | 3.27                          | 2.43                         |
| SC              | 3.43                          | 1.92                         | 4.03                          | 1.85                         | 2.95                          | 1.9                          |
| VA              | 2.73                          | 2.39                         | 3.16                          | 2.9                          | 2.62                          | 2.24                         |
| TX              | 4.6                           | 3.16                         | 5.1                           | 3.68                         | 3.79                          | 2.37                         |
| <b>Average</b>  | 3.32                          | 2.29                         | 3.45                          | 2.30                         | 3.09                          | 2.17                         |

107  
108  
109  
110  
111  
112  
113  
114  
115  
116  
117  
118  
119  
120

**6 Estimating the optimal number of clusters**

Among all indices:  
 Eight (8) proposed 2 as the best number of clusters.  
 Two (2) proposed 3 as the best number of clusters.  
 Two (2) proposed 4 as the best number of clusters.  
 Seven (7) proposed 5 as the best number of clusters.  
 Two (2) proposed 6 as the best number of clusters.  
 One (1) proposed 13 as the best number of clusters.  
 Two (2) proposed 14 as the best number of clusters.

Table S9: Methods evaluated to determine the optimal number of clusters using NbClust

| #  | Methods    | Number of clusters | Value Index      |
|----|------------|--------------------|------------------|
| 1  | KL         | 6                  | 12.525           |
| 2  | CH         | 5                  | 2455.144         |
| 3  | Hartigan   | 5                  | 1479.653         |
| 4  | CCC        | 2                  | 86.151           |
| 5  | Scott      | 5                  | 2750.553         |
| 6  | Marriot    | 5                  | 349227082927.000 |
| 7  | TrCovW     | 3                  | 107827250739.000 |
| 8  | TraceW     | 5                  | 135580.700       |
| 9  | Friedman   | 14                 | 52.457           |
| 10 | Rubin      | 5                  | 11.169           |
| 11 | Cindex     | 6                  | 0.253            |
| 12 | DB         | 2                  | 0.882            |
| 13 | Silhouette | 2                  | 0.384            |
| 14 | Duda       | 2                  | 0.723            |

|    |            |    |            |
|----|------------|----|------------|
| 15 | PseudoT2   | 2  | 1043.876   |
| 16 | Beale      | 2  | 0.381      |
| 17 | Ratkowsky  | 4  | 0.379      |
| 18 | Ball       | 3  | 195959.500 |
| 19 | PtBiserial | 5  | 0.520      |
| 20 | Frey       | 2  | 2.381      |
| 21 | McClain    | 2  | 0.186      |
| 22 | Dunn       | 13 | 0.010      |
| 23 | Hubert     | 0  | 0.000      |
| 24 | SDindex    | 4  | 0.203      |
| 25 | Dindex     | 0  | 0.000      |
| 26 | SDbw       | 14 | 0.280      |

121  
122  
123  
124  
125  
126  
127  
128  
129  
130  
131  
132  
133

Conclusion: According to the majority rule, the best number of clusters is 2.

### 7 Model fit using NOAA RH and T for the 0.5-km radius dataset

To better estimate if NOAA meteorological data can replace PurpleAir meteorological data, we compared their DP since the water content and DP should be the same for the PurpleAir and the NOAA sites. Figure S5, which used all the hourly datapoints of our study, showed a Pearson correlation of 96 %. Except TX, which represented only 0.32 % of our dataset and exhibited a low correlation (13 %), all the NOAA sites resulted in a high correlation ranging from 80 to 97 % with PurpleAir sites.

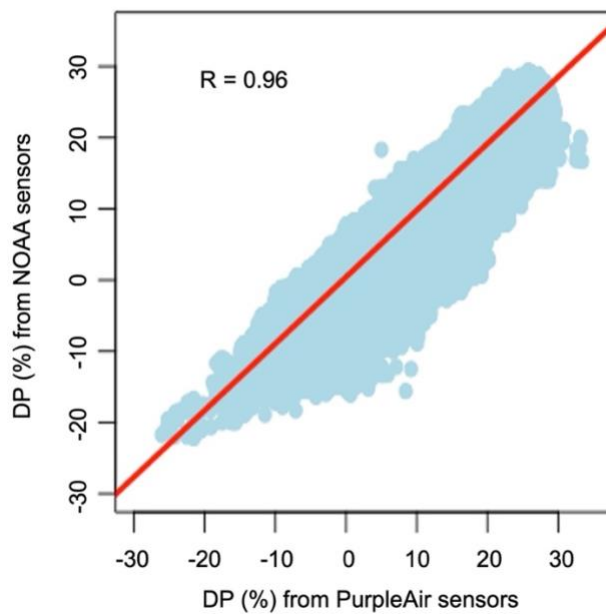

134  
135

Figure S5: Correlation between DP from PurpleAir and NOAA

136

137 Table S10: MLR and SSC model development (model fit using hourly data) for the 0.5-km radius

| Parameters              |                                                                                               | Model development     |                                  |                                 |          | Sensitivity analysis  |                                  |                                 |          |
|-------------------------|-----------------------------------------------------------------------------------------------|-----------------------|----------------------------------|---------------------------------|----------|-----------------------|----------------------------------|---------------------------------|----------|
| Models                  |                                                                                               | R <sup>2</sup><br>(%) | RMSE<br>( $\mu\text{g m}^{-3}$ ) | MAE<br>( $\mu\text{g m}^{-3}$ ) | R<br>(%) | R <sup>2</sup><br>(%) | RMSE<br>( $\mu\text{g m}^{-3}$ ) | MAE<br>( $\mu\text{g m}^{-3}$ ) | R<br>(%) |
| <b>MLR</b>              | 4.4968840+0.4184462 PA <sub>i</sub> -<br>0.0353587 RH <sub>i</sub> + 0.0779764 T <sub>i</sub> | 72                    | 2.99                             | 2.01                            | 85       | 78                    | 2.28                             | 1.62                            | 88       |
| <b>SSC</b><br>(RH ≤ 50) | 2.874778+0.461934 PA <sub>i</sub> -<br>0.009394 RH <sub>i</sub> + 0.077146 T <sub>i</sub>     | 76                    | 2.72                             | 1.74                            | 87       | 85                    | 1.94                             | 1.32                            | 92       |
| <b>SSC</b><br>(RH > 50) | 5.6571930+0.4101217 PA <sub>i</sub> -<br>0.0472842 RH <sub>i</sub> + 0.0724931 T <sub>i</sub> | 72                    | 3.03                             | 2.05                            | 85       | 77                    | 2.31                             | 1.64                            | 88       |

138  
139  
140  
141  
142  
143  
144  
145  
146  
147  
148  
149  
150  
151  
152  
153

### 8 Evaluation of the performance of the models by AQI category

Air Quality Index (AQI) is a communication tool used by EPA to inform public health. AQI for PM<sub>2.5</sub> is based on a 24-hour average with 6 categories of potential health impact: Good, Moderate, Unhealthy for sensitive groups, Unhealthy, Very Unhealthy, and Hazardous. They each correspond to a color code and a standard range of values.

Table S11 presents the distribution of all the evaluated data per AQI category. Table S12 shows the total percentage of correct AQI reported by each model with their under and over estimation. Models 4 and SSC reported the highest percentage of correct AQIs with a fairly even distribution of under- and overestimation shown by the SSC. Model Bj displayed a much higher underestimation than overestimation.

Table S11: Evaluation of the performance of the models by AQI category

| Models   | AQI definition                                                        | % of the data | Correct AQI (%) | Under-estimation (%) | Over-estimation (%) |
|----------|-----------------------------------------------------------------------|---------------|-----------------|----------------------|---------------------|
| SSC      | Good<br>(0.0 – 9.0 $\mu\text{g m}^{-3}$ )                             | 60.66         | 86.56           | 0.00                 | 13.44               |
| Model 4  |                                                                       |               | 88.68           | 0.00                 | 11.32               |
| Model Bj |                                                                       |               | 95.14           | 0.00                 | 4.86                |
| Raw PA   |                                                                       |               | 61.16           | 0.00                 | 38.84               |
| SSC      | Moderate<br>(9.1 – 35.4 $\mu\text{g m}^{-3}$ )                        | 38.99         | 81.03           | 18.92                | 0.04                |
| Model 4  |                                                                       |               | 77.95           | 22.05                | 0.00                |
| Model Bj |                                                                       |               | 66.77           | 32.96                | 0.27                |
| Raw PA   |                                                                       |               | 91.99           | 7.74                 | 7.88                |
| SSC      | Unhealthy for sensitive groups<br>(35.5 – 55.4 $\mu\text{g m}^{-3}$ ) | 0.33          | 52.63           | 47.37                | 0.00                |
| Model 4  |                                                                       |               | 52.63           | 47.37                | 0.00                |
| Model Bj |                                                                       |               | 78.95           | 15.79                | 5.26                |
| Raw PA   |                                                                       |               | 0.00            | 0.00                 | 100.00              |
| SSC      | Unhealthy                                                             | 0.02          | 0.00            | 100.00               | 0.00                |
| Model 4  |                                                                       |               | 0.00            | 100.00               | 0.00                |

|          |                                      |  |        |        |      |
|----------|--------------------------------------|--|--------|--------|------|
| Model Bj | (55.5 – 125.4 $\mu\text{g m}^{-3}$ ) |  | 0.00   | 100.00 | 0.00 |
| Raw PA   |                                      |  | 100.00 | 0.00   | 0.00 |

154

155

Table S12: Summary table of the evaluation of the AQI per model for the daily dataset

| Models   | Correct AQI (%) | Under-estimation (%) | Over-estimation (%) |
|----------|-----------------|----------------------|---------------------|
| SSC      | 84.01           | 7.49                 | 8.17                |
| Model 4  | 84.10           | 8.70                 | 6.87                |
| Model Bj | 83.78           | 12.81                | 3.07                |
| Raw PA   | 72.68           | 2.99                 | 26.94               |

156

157

158

159

**9 Additional table**

160 Table S13: List of the PurpleAir sensors and Federal Reference Method (FRM) or Federal Equivalence Method (FEM) used in the study with the  
 161 estimated distance between stations

| Site # | PA ID  | PA latitude | PA longitude | AQS ID    | FRM/FEM Type                                          | Distance PA-AQS (km) | **Number PA-AQS Data points | NOAA ID      | Distance PA-NOAA (km) |
|--------|--------|-------------|--------------|-----------|-------------------------------------------------------|----------------------|-----------------------------|--------------|-----------------------|
| FL     | 25949  | 27.29050    | -82.50697    | 121150013 | Teledyne T640                                         | 0.028                | 13978                       | 722115-12871 | 13.392                |
| FL     | 16317  | 27.29050    | -82.50830    | 121150013 | Teledyne T640                                         | 0.123                | 21012                       | 722115-12871 | 13.350                |
| FL     | 101259 | 27.95523    | -82.46953    | 120570113 | Teledyne T640                                         | 0.011                | 2655                        | 722110-12842 | 7.877                 |
| FL     | 149710 | 27.95523    | -82.46956    | 120570113 | Teledyne T640                                         | 0.011                | 3060                        | 722110-12842 | 7.874                 |
| *GA    | 142428 | 33.77928    | -84.39596    | 131210056 | R & P Model 2025 PM-2.5 Sequential Air Sampler w/VSCC | 0.500                | -                           | 722190-13874 | 17.434                |
| *GA    | 148123 | 33.77932    | -84.39611    | 131210056 | R & P Model 2025 PM-2.5 Sequential Air Sampler w/VSCC | 0.500                | -                           | 722190-13874 | 17.434                |
| SC     | 35139  | 32.84358    | -79.95844    | 450190020 | Teledyne T640X                                        | 0.438                | 7264                        | 722080-13880 | 10.972                |
| NC     | 98623  | 35.24020    | -80.78570    | 371190041 | Met One BAM-1020                                      | 0.307                | 8495                        | 723140-13881 | 18.780                |
| NC     | 6008   | 36.11095    | -80.22445    | 370670022 | Teledyne T640X                                        | 0.005                | 19560                       | 723193-93807 | 2.445                 |
| VA     | 178279 | 36.84141    | -76.18123    | 518100008 | Teledyne T640X                                        | 0.052                | 1109                        | 723080-13737 | 7.038                 |
| TX     | 166421 | 29.82794    | -95.28375    | 482010046 | Met One BAM-1022                                      | 0.053                | 508                         | 720594-00188 | 16.597                |
| TN     | 176311 | 36.05266    | -89.38216    | 470450004 | Met One BAM-1022                                      | 0.033                | 2412                        | 723347-03809 | 6.604                 |
| TN     | 93593  | 35.70589    | -88.81981    | 471130010 | Met One BAM-1022                                      | 0.066                | 2187                        | 723346-03811 | 16.645                |
| TN     | 51741  | 35.11688    | -87.41976    | 470990003 | Met One BAM-1022                                      | 0.004                | 18790                       | 723235-13896 | 46.322                |
| TN     | 51867  | 35.11688    | -87.41972    | 470990003 | Met One BAM-1022                                      | 0.001                | 20578                       | 723235-13896 | 46.323                |
| *TN    | 51737  | 35.11685    | -87.41972    | 470990003 | Met One BAM-1022                                      | 0.002                | -                           | 723235-13896 | 46.321                |
| TN     | 93577  | 35.65182    | -87.00883    | 471192007 | Met One BAM-1022                                      | 0.086                | 7620                        | 723249-00463 | 21.910                |
| TN     | 93645  | 36.17619    | -86.73885    | 470370023 | Teledyne T640X                                        | 0.064                | 10893                       | 723270-13897 | 9.235                 |
| TN     | 51921  | 36.17634    | -86.73898    | 470370023 | Teledyne T640X                                        | 0.058                | 6750                        | 723270-13897 | 9.264                 |
| TN     | 51873  | 36.17625    | -86.73911    | 470370023 | Teledyne T640X                                        | 0.076                | 11779                       | 723270-13897 | 9.262                 |
| TN     | 116559 | 36.17699    | -86.74283    | 470370023 | Teledyne T640X                                        | 0.474                | 998                         | 723270-13897 | 9.589                 |

162 \* sensor removed after QA process

163 \*\* valid data points used in our study after the QA process

164  
165

Table S14: Tests of model coefficient precision

| Number of significant figures | RMSE     | MAE      | R <sup>2</sup> |
|-------------------------------|----------|----------|----------------|
| Model 3                       |          |          |                |
| 8                             | 2.318026 | 1.674111 | 0.7717575      |
| 4                             | 2.318178 | 1.674819 | 0.7717097      |
| 3                             | 2.320251 | 1.664604 | 0.7724541      |
| Model 4                       |          |          |                |
| 8                             | 2.236673 | 1.595438 | 0.7871297      |
| 4                             | 2.237311 | 1.597079 | 0.7870842      |
| 3                             | 2.244286 | 1.610342 | 0.7865547      |

166  
167  
168  
169  
170  
171  
172  
173

**References**

U.S. EPA, <https://document.airnow.gov/technical-assistance-document-for-the-reporting-of-daily-air-quality.pdf>, accessed on June 22, 2024
